# Supplementary material for: Microvascular disease not type 2 diabetes is associated with increased cortical porosity: A study of cortical bone microstructure and intracortical vessel characteristics
Source: PubMed Central journal article supplement — Bone Rep. 2024 Feb 25;20:101745. doi: 10.1016/j.bonr.2024.101745 (PMC10912053; doi:10.1016/j.bonr.2024.101745), 2024-02-25
Supplement: mmc1.pdf [file mmc1.pdf]

## Supplementary Material

**Supplemental Table 1: Comparison of Hr-pQCT parameters between participants with T2D and without diabetes. Unadjusted and adjusted means are compared in independent sample t-tests and linear regression models adjusting for age, sex, and BMI, respectively. Statistically significant p-values are in bold.**

|                               | T2D (n=38)      | No T2D (n=37)   | T2D vs. no T2D     |         | T2D vs. no T2D           |              |
|-------------------------------|-----------------|-----------------|--------------------|---------|--------------------------|--------------|
|                               | Mean $\pm$ SD   | Mean $\pm$ SD   | Difference (CI)    | P-value | Adjusted Difference (CI) | P-value      |
| Ct.Po, %                      | 8.65 $\pm$ 4.50 | 8.45 $\pm$ 3.30 | 0.20 (-1.62, 2.02) | 0.827   | 0.70 (-1.07, 2.47)       | 0.432        |
| Ct.Po.V, mm <sup>3</sup>      | 99.7 $\pm$ 53.2 | 93.1 $\pm$ 40.4 | 6.61 (-15.2, 28.4) | 0.547   | 8.37 (-13.8, 30.6)       | 0.455        |
| Ct.Po.Dm, $\mu$ m             | 206 $\pm$ 30.6  | 196 $\pm$ 21.9  | 10.2 (-2.11, 22.5) | 0.103   | 14.6 (2.70, 26.5)        | <b>0.017</b> |
| Ct.Po.Dm.SD, $\mu$ m          | 95.2 $\pm$ 19.4 | 89.1 $\pm$ 14.3 | 6.12 (-1.74, 14.0) | 0.125   | 8.73 (0.79, 16.7)        | <b>0.032</b> |
| Ct.Th, mm                     | 1.36 $\pm$ 0.28 | 1.26 $\pm$ 0.22 | 0.10 (-0.02, 0.21) | 0.101   | 0.08 (-0.04, 0.19)       | 0.191        |
| Ct.BMD, mg HA/cm <sup>3</sup> | 845 $\pm$ 79.1  | 840 $\pm$ 74.2  | 4.22 (-31.1, 39.5) | 0.812   | -2.84 (-37.5, 31.8)      | 0.871        |

**Supplemental Table 2: Comparison of Hr-pQCT parameters between participants with and without MVD. Unadjusted and adjusted means are compared in independent sample t-tests and linear regression models adjusting for T2D, age, sex, and BMI, respectively. Statistically significant P-values are in bold.**

|                               | MVD (n=30)       | No MVD (n=45)   | MVD vs. no MVD       |              | MVD vs. no MVD           |              |
|-------------------------------|------------------|-----------------|----------------------|--------------|--------------------------|--------------|
|                               | Mean $\pm$ SD    | Mean $\pm$ SD   | Difference (CI)      | P-value      | Adjusted Difference (CI) | P-value      |
| Ct.Po, %                      | 9.98 $\pm$ 5.19  | 7.60 $\pm$ 2.43 | 2.37 (0.60, 4.15)    | <b>0.025</b> | 2.25 (0.53, 3.97)        | <b>0.011</b> |
| Ct.Po.V, mm <sup>3</sup>      | 112.6 $\pm$ 60.9 | 85.6 $\pm$ 31.6 | 27.0 (5.63, 48.4)    | <b>0.031</b> | 24.2 (2.32, 46.1)        | <b>0.031</b> |
| Ct.Po.Dm, $\mu$ m             | 205 $\pm$ 31.2   | 199 $\pm$ 23.9  | 5.54 (-7.16, 18.3)   | 0.387        | 1.22 (-10.9, 13.4)       | 0.841        |
| Ct.Po.Dm.SD, $\mu$ m          | 93.5 $\pm$ 20.5  | 91.3 $\pm$ 14.8 | 2.28 (-5.85, 10.4)   | 0.578        | -0.36 (-8.46, 7.74)      | 0.929        |
| Ct.Th, mm                     | 1.29 $\pm$ 0.25  | 1.32 $\pm$ 0.26 | -0.02 (-0.14, 0.10)  | 0.693        | -0.06 (-0.17, 0.06)      | 0.309        |
| Ct.BMD, mg HA/cm <sup>3</sup> | 817 $\pm$ 93.5   | 859 $\pm$ 57.2  | -42.2 (-76.8, -7.49) | <b>0.033</b> | -43.6 (-77.4, -9.81)     | <b>0.012</b> |

**Supplemental Table 3: Comparison of DCE-MRI vessel metrics between participants with T2D and without diabetes. Unadjusted and adjusted means are compared in independent sample t-tests and linear regression models adjusting for age, sex, and BMI, respectively. Statistically significant p-values are in bold. \*DCE-MRI of one control participant could not be evaluated due to motion artifacts.**

|                                     | T2D (n=38)      | No T2D (n=37)*  | T2D vs. no T2D      |              | T2D vs. no T2D           |              |
|-------------------------------------|-----------------|-----------------|---------------------|--------------|--------------------------|--------------|
|                                     | Mean $\pm$ SD   | Mean $\pm$ SD   | Difference (CI)     | P-value      | Adjusted Difference (CI) | P-value      |
| Vessel density, mm <sup>-3</sup>    | 0.25 $\pm$ 0.20 | 0.33 $\pm$ 0.20 | -0.08 (-0.18, 0.01) | 0.073        | -0.08 (-0.18, 0.02)      | 0.128        |
| Avg. vessel volume, mm <sup>3</sup> | 0.08 $\pm$ 0.04 | 0.07 $\pm$ 0.02 | 0.02 (0.001, 0.03)  | <b>0.034</b> | 0.02 (0.004, 0.04)       | <b>0.017</b> |
| Avg. vessel diameter, $\mu$ m       | 272 $\pm$ 34.1  | 258 $\pm$ 23.0  | 13.7 (0.11, 27.2)   | <b>0.046</b> | 15.4 (0.42, 30.4)        | <b>0.044</b> |
| Vessel-pore ratio, %                | 35.5 $\pm$ 30.3 | 39.3 $\pm$ 23.9 | -3.73 (-16.4, 8.96) | 0.560        | -4.90 (-18.5, 8.73)      | 0.476        |

**Supplemental Table 4: Comparison of DCE-MRI vessel metrics between participants with and without MVD. Unadjusted and adjusted means are compared in independent sample t-tests and linear regression models adjusting for T2D, age, sex, and BMI, respectively. Statistically significant P-values are in bold. \*DCE-MRI of one control participant without MVD could not be evaluated due to motion artifacts.**

|                                     | MVD (n=30)  | No MVD (n=45)* | MVD vs. no MVD       |         | MVD vs. no MVD           |              |
|-------------------------------------|-------------|----------------|----------------------|---------|--------------------------|--------------|
|                                     | Mean ± SD   | Mean ± SD      | Difference (CI)      | P-value | Adjusted Difference (CI) | P-value      |
| Vessel density, mm <sup>-3</sup>    | 0.33 ± 0.22 | 0.26 ± 0.19    | 0.07 (-0.03, 0.16)   | 0.172   | 0.11 (0.01, 0.21)        | <b>0.033</b> |
| Avg. vessel volume, mm <sup>3</sup> | 0.07 ± 0.02 | 0.08 ± 0.04    | -0.01 (-0.03, 0.005) | 0.130   | -0.02 (-0.04, -0.004)    | <b>0.014</b> |
| Avg. vessel diameter, μm            | 261 ± 23.1  | 269 ± 33.5     | -7.83 (-21.9, 6.22)  | 0.270   | -14.6 (-29.1, -0.11)     | <b>0.048</b> |
| Vessel-pore ratio, %                | 40.5 ± 29.4 | 35.2 ± 25.8    | 5.30 (-7.59, 18.2)   | 0.415   | 8.70 (-4.68, 22.1)       | 0.199        |

**Supplemental Table 5: Comparison of cortical bone parameters/vessel metrics between participants with and without MVD in T2D subgroup. Means are compared in t-tests. Adjusted means are calculated in linear regression adjusting for age, sex, and BMI. Statistically significant P-values are in bold.**

|                                     | MVD (n=17)   | No MVD (n=21) | MVD vs. no MVD        |         | MVD vs. no MVD           |         |
|-------------------------------------|--------------|---------------|-----------------------|---------|--------------------------|---------|
|                                     | Mean ± SD    | Mean ± SD     | Difference (CI)       | P-value | Adjusted Difference (CI) | P-value |
| <b>Hr-pQCT</b>                      |              |               |                       |         |                          |         |
| Ct.Po, %                            | 9.36 ± 5.69  | 7.77 ± 2.20   | 1.59 (-1.38, 4.56)    | 0.249   | 1.31 (-1.44, 4.05)       | 0.340   |
| Ct.Po.V, mm <sup>3</sup>            | 104.9 ± 64.4 | 93.2 ± 35.8   | 11.7 (-23.8, 47.1)    | 0.510   | 11.2 (-24.0, 46.4)       | 0.522   |
| Ct.Po.Dm, μm                        | 207 ± 35.3   | 205 ± 24.6    | 2.61 (-17.9, 23.1)    | 0.798   | 0.04 (-18.3, 18.4)       | 0.996   |
| Ct.Po.Dm.SD, μm                     | 95.8 ± 22.3  | 94.5 ± 15.7   | 1.30 (-11.7, 14.3)    | 0.840   | 0.03 (-12.3, 12.3)       | 0.996   |
| Ct.Th, mm                           | 1.32 ± 0.26  | 1.40 ± 0.30   | -0.07 (-0.26, 0.11)   | 0.421   | -0.05 (-0.23, 0.13)      | 0.547   |
| Ct.BMD, mg HA/cm <sup>3</sup>       | 830 ± 97.4   | 863 ± 44.5    | -32.7 (-84.6, 19.2)   | 0.181   | -27.9 (-77.7, 21.9)      | 0.263   |
| <b>DCE-MRI</b>                      |              |               |                       |         |                          |         |
| Vessel density, mm <sup>-3</sup>    | 0.29 ± 0.22  | 0.20 ± 0.18   | 0.10 (-0.03, 0.23)    | 0.141   | 0.10 (-0.04, 0.23)       | 0.143   |
| Avg. vessel volume, mm <sup>3</sup> | 0.07 ± 0.03  | 0.10 ± 0.05   | -0.02 (-0.049, 0.003) | 0.111   | -0.02 (-0.048, 0.003)    | 0.086   |
| Avg. vessel diameter, μm            | 265 ± 25.0   | 280 ± 42.0    | -15.2 (-37.45, 7.08)  | 0.175   | -15.2 (-37.71, 7.33)     | 0.179   |
| Vessel-pore ratio, %                | 41.7 ± 33.6  | 27.9 ± 24.6   | 13.8 (-5.96, 33.64)   | 0.165   | 14.1 (-5.38, 33.66)      | 0.150   |
